# Supplementary material for: AR-V7 exhibits non-canonical mechanisms of nuclear import and chromatin engagement in castrate-resistant prostate cancer
Source: eLife journal article supplement (doi:10.7554/elife.73396), 2022-07-18
Supplement: supp [file elife-73396-supp-v1.zip]

Figure 6-source data 1

G

Anti-AR-fl

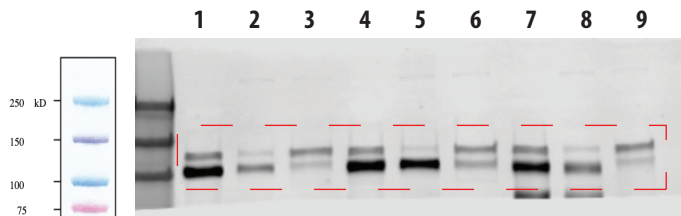

Condition:

- Lane 1: Vehicle control cytosolic extract (CE)
- Lane 2: Vehicle control nuclear extract (NE)
- Lane 3: Vehicle control chromatin-bound nuclear extract (CB)
- Lane 4: R1881 cytosolic extract (CE)
- Lane 5: R1881 nuclear extract (NE)
- Lane 6: R1881 chromatin-bound nuclear extract (CB)
- Lane 7: Dox cytosolic extract (CE)
- Lane 8: Dox nuclear extract (NE)
- Lane 9: Dox chromatin-bound nuclear extract (CB)

MW of AR-fl: 110 kDa

The indicated cropped area of the blot is shown in the manuscript data.

Anti-AR-v7

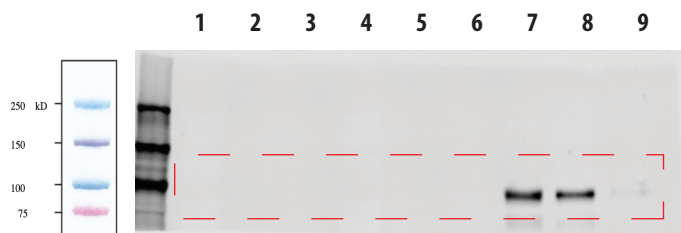

Condition:

- Lane 1: Vehicle control cytosolic extract (CE)
- Lane 2: Vehicle control nuclear extract (NE)
- Lane 3: Vehicle control chromatin-bound nuclear extract (CB)
- Lane 4: R1881 cytosolic extract (CE)
- Lane 5: R1881 nuclear extract (NE)
- Lane 6: R1881 chromatin-bound nuclear extract (CB)
- Lane 7: Dox cytosolic extract (CE)
- Lane 8: Dox nuclear extract (NE)
- Lane 9: Dox chromatin-bound nuclear extract (CB)

MW of GFP-AR-v7: 102 kDa

The indicated cropped area of the blot is shown in the manuscript data.

$\beta$ -tubulin

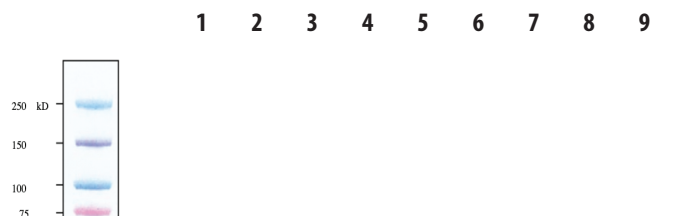

Condition:

- Lane 1: Vehicle control cytosolic extract (CE)
- Lane 2: Vehicle control nuclear extract (NE)
- Lane 3: Vehicle control chromatin-bound nuclear extract (CB)
- Lane 4: R1881 cytosolic extract (CE)
- Lane 5: R1881 nuclear extract (NE)
- Lane 6: R1881 chromatin-bound nuclear extract (CB)
- Lane 7: Dox cytosolic extract (CE)
- Lane 8: Dox nuclear extract (NE)
- Lane 9: Dox chromatin-bound nuclear extract (CB)

MW of  $\beta$ -tubulin: 50 kDa

The indicated cropped area of the blot is shown in the manuscript data.

Anti-Histone 3

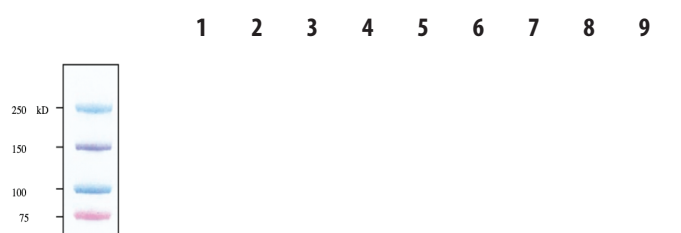

Condition:

- Lane 1: Vehicle control cytosolic extract (CE)
- Lane 2: Vehicle control nuclear extract (NE)
- Lane 3: Vehicle control chromatin-bound nuclear extract (CB)
- Lane 4: R1881 cytosolic extract (CE)
- Lane 5: R1881 nuclear extract (NE)
- Lane 6: R1881 chromatin-bound nuclear extract (CB)
- Lane 7: Dox cytosolic extract (CE)
- Lane 8: Dox nuclear extract (NE)
- Lane 9: Dox chromatin-bound nuclear extract (CB)

MW of Histone 3: 15 kDa

The indicated cropped area of the blot is shown in the manuscript data.
