# Supplementary material for: AR-V7 exhibits non-canonical mechanisms of nuclear import and chromatin engagement in castrate-resistant prostate cancer
Source: eLife journal article supplement (doi:10.7554/elife.73396), 2022-07-18
Supplement: supp [file elife-73396-supp-v1.zip]

**Figure 5- figure supplement 1**

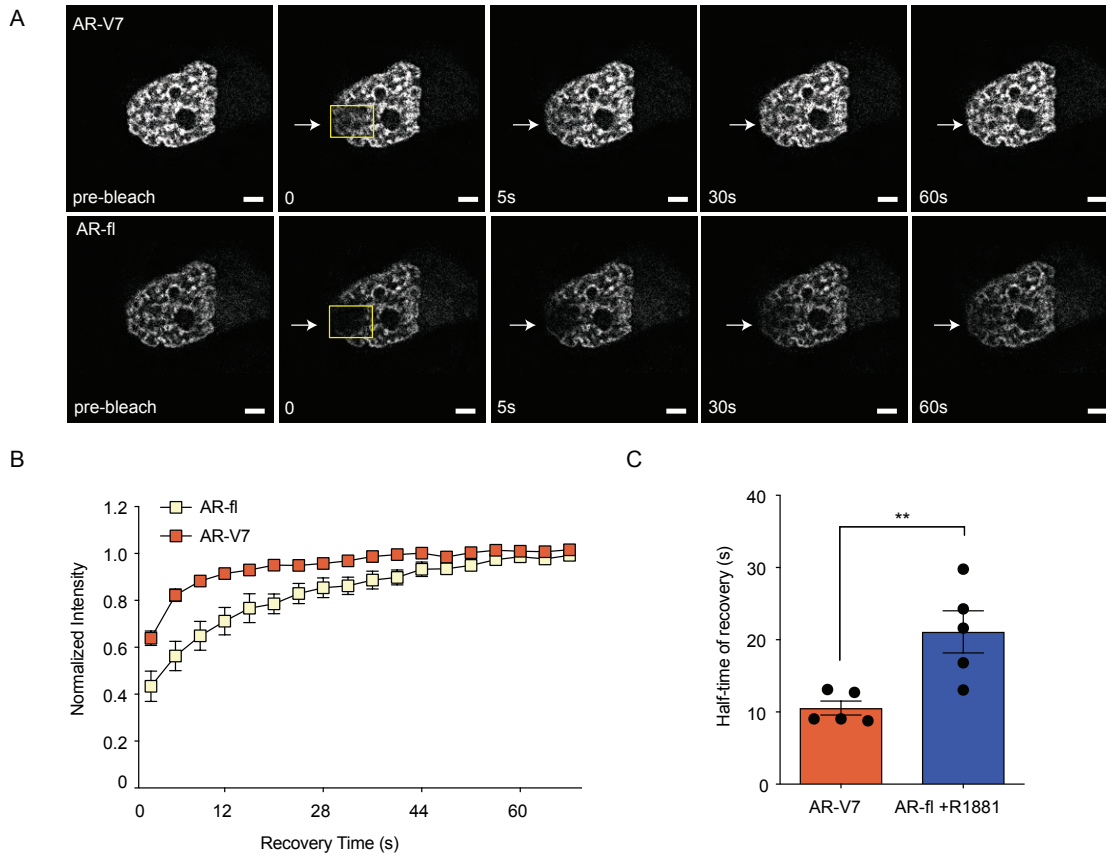

**Figure 5- figure supplement 1. AR-V7 intranuclear mobility is not affected by co-expression of ligand-bound AR-fl.** **A.** FRAP was performed in PC3 cells co-microinjected with mCherry-AR-fl and GFP-AR-V7 followed by treatment with 10 nM R1881 for 2hrs. Representative images from the same single cell co-expressing the two AR proteins are shown. **B.** Kinetics of protein recovery after photobleaching for each protein, when co-expressed in the same single cell, are graphically displayed. The fluorescence intensity in the bleached area was measured and depicted as the normalized recovery. **C.** Half-time of recovery ( $T_{1/2}$ ) required for the fluorescence intensity to reach 50% of its pre-bleach intensity was compared,  $n=5$ . Data represent Mean  $\pm$  SEM,  $p$ -value (\*\* $p < 0.01$ ) is obtained using unpaired two-tailed  $t$ -test. Experiments were repeated at least twice.
