# Supplementary material for: AR-V7 exhibits non-canonical mechanisms of nuclear import and chromatin engagement in castrate-resistant prostate cancer
Source: eLife journal article supplement (doi:10.7554/elife.73396), 2022-07-18
Supplement: supp [file elife-73396-supp-v1.zip]

**Figure 7- figure supplement 1**

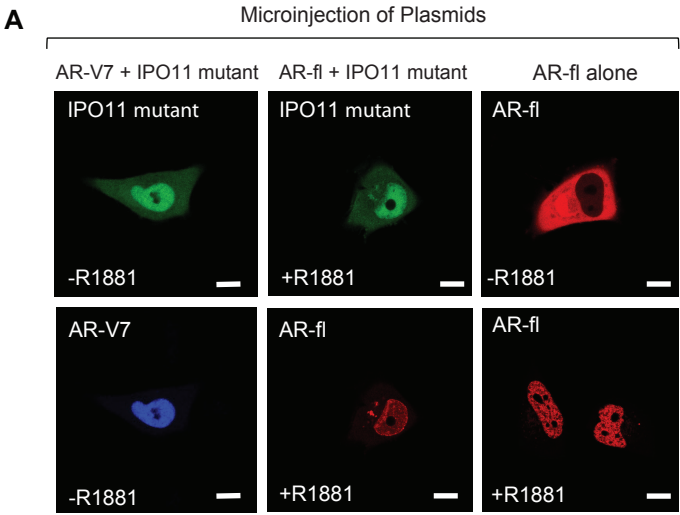

**Figure 7- figure supplement 1. Dominant negative IPO11 does not abrogate the nuclear import of AR-fl or AR-V7. A.** Plasmid encoding mCherry tagged AR-fl and/or a dominant negative mutant IPO11 was microinjected into PC3 cells. 45 mins post microinjection, representative images were captured by live cell confocal microscopy.
