# Supplementary material for: AR-V7 exhibits non-canonical mechanisms of nuclear import and chromatin engagement in castrate-resistant prostate cancer
Source: eLife journal article supplement (doi:10.7554/elife.73396), 2022-07-18
Supplement: supp [file elife-73396-supp-v1.zip]

Figure 6- figure supplement 1

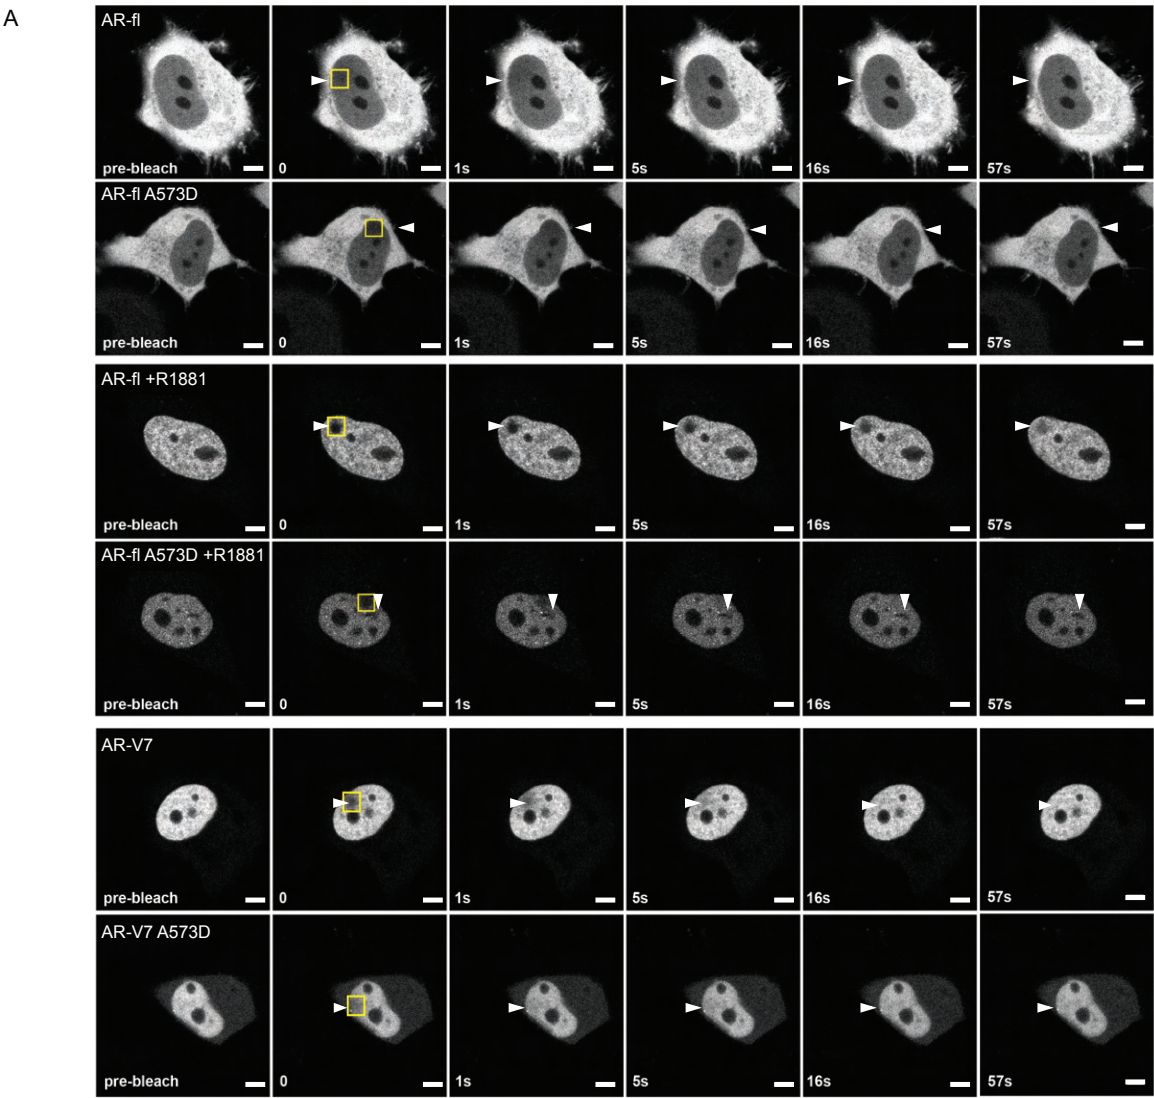

**Figure 6- figure supplement 1. DBD mutation increases the intranuclear mobility of liganded-AR-fl and AR-V7. A.** FRAP was performed in the nuclei of PC3 cells following transient expression of GFP-AR-fl or GFP-AR-fl A573D (in the presence of 10 nM R1881) or GFP-AR-V7 or GFP-AR-fl A573D. Representative images of cells at the indicated time points are shown. Arrow heads show the photo-bleaching area. Scale bar, 10 $\mu$ m. Experiments were repeated at least twice.
